# Supplementary material
Source: bioRxiv or medRxiv preprint supplement (https://www.biorxiv.org/highwire/filestream/19546/field_highwire_adjunct_files/1/062455-2.pdf)
Supplement: Supplementary file [file 062455-2.pdf]

# Independent

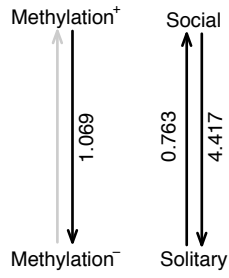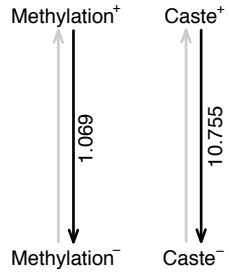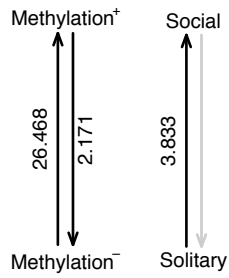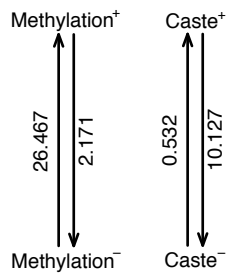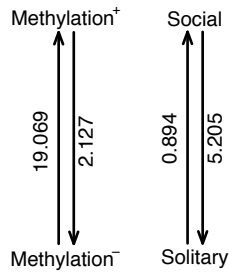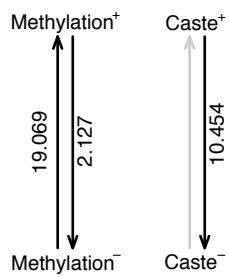

# Dependent

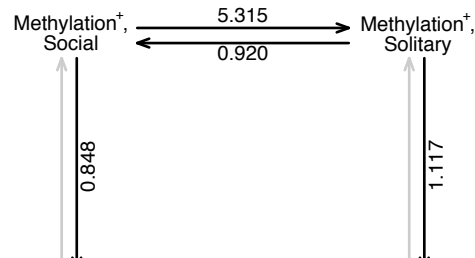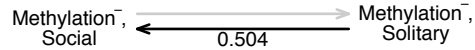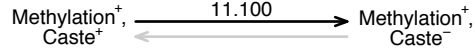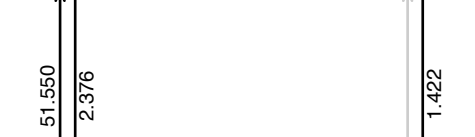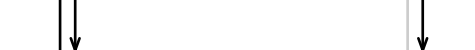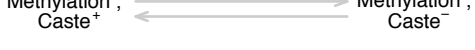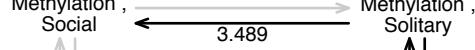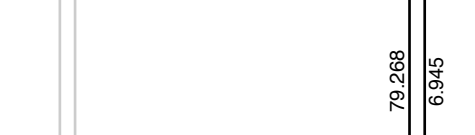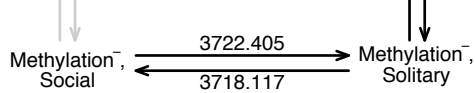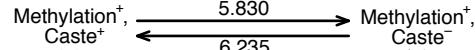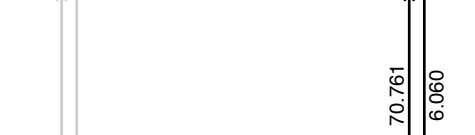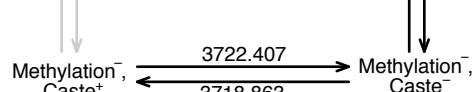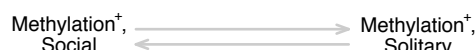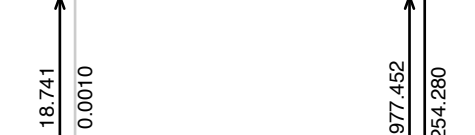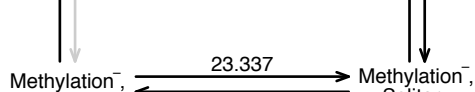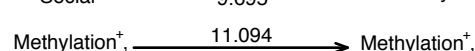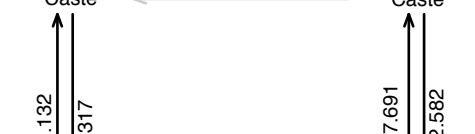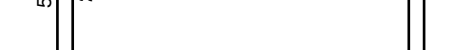

Insecta+Diplura+Crustacea

Hymenoptera

Diptera-
